# Supplementary material for: Evolutionary History of Chordate PAX Genes: Dynamics of Change in a Complex Gene Family
Source: PLoS One. 2013 Sep 2;8(9):e73560. doi: 10.1371/journal.pone.0073560 (PMC3759438; doi:10.1371/journal.pone.0073560)
Supplement: Table S2 — Species considered in this study and font of hits. (XLSX) [file pone.0073560.s003.xlsx]

## Sheet: Plan1
Table S2. Species considered in this study and font of hits
Species	Common name	Phylum	Superclass	Class/Group	Superorder	Order/Family/Group	HMMER	GEN	Ensembl	UCSC	SYN
Pan troglodytes	chimpanzee	Craniata	Gnathostomata	Mammalia	Euarchontoglires	Primates	9	9	1	1	1
Pan paniscus	bonobo	Craniata	Gnathostomata	Mammalia	Euarchontoglires	Primates	2	ND	0	0	0
Homo sapiens	human	Craniata	Gnathostomata	Mammalia	Euarchontoglires	Primates	9	9	1	1	1
Gorilla gorilla	gorilla	Craniata	Gnathostomata	Mammalia	Euarchontoglires	Primates	9	9	1	1	1
Pongo abelii	orangutan	Craniata	Gnathostomata	Mammalia	Euarchontoglires	Primates	9	9	1	1	1
Pongo pygmaeus	bornean orangutan	Craniata	Gnathostomata	Mammalia	Euarchontoglires	Primates	1	ND	0	0	0
Nomascus leucogenys	gibbon	Craniata	Gnathostomata	Mammalia	Euarchontoglires	Primates	9	9	1	1	1
Hylobates klossii	dwarf sianang	Craniata	Gnathostomata	Mammalia	Euarchontoglires	Primates	1	ND	0	0	1
Hylobates syndactylus	Siamang	Craniata	Gnathostomata	Mammalia	Euarchontoglires	Primates	1	ND	0	0	0
Colobus angolensis palliatus	tanzanian black-and-white colobus	Craniata	Gnathostomata	Mammalia	Euarchontoglires	Primates	1	ND	0	0	0
Papio anubis	baboon	Craniata	Gnathostomata	Mammalia	Euarchontoglires	Primates	2	9	0	1	0
Mandrillus leucophaeus	drill	Craniata	Gnathostomata	Mammalia	Euarchontoglires	Primates	1	ND	0	0	0
Macaca mulatta	rhesus	Craniata	Gnathostomata	Mammalia	Euarchontoglires	Primates	9	9	1	1	1
Macaca fascicularis	cynomolgus monkey	Craniata	Gnathostomata	Mammalia	Euarchontoglires	Primates	9	9	0	0	0
Cercopithecus cephus	moustached monkey	Craniata	Gnathostomata	Mammalia	Euarchontoglires	Primates	1	ND	0	0	0
Aotus infulatus	feline night monkey	Craniata	Gnathostomata	Mammalia	Euarchontoglires	Primates	1	ND	0	0	0
Lagothrix lagotricha	woolly monkey	Craniata	Gnathostomata	Mammalia	Euarchontoglires	Primates	1	ND	0	0	0
Ateles belzebuth chamek	black-faced spider monkey	Craniata	Gnathostomata	Mammalia	Euarchontoglires	Primates	1	ND	0	0	0
Ateles geoffroyi	spider monkey	Craniata	Gnathostomata	Mammalia	Euarchontoglires	Primates	1	ND	0	0	0
Saimiri boliviensis	squirrel monkey	Craniata	Gnathostomata	Mammalia	Euarchontoglires	Primates	1	ND	1	1	0
Saimiri sciureus	south american squirrel monkey	Craniata	Gnathostomata	Mammalia	Euarchontoglires	Primates	1	ND	0	0	0
Saguinus labiatus	red-chested moustached tamarin	Craniata	Gnathostomata	Mammalia	Euarchontoglires	Primates	1	ND	0	0	0
Saguinus oedipus	cotton-top tamarin	Craniata	Gnathostomata	Mammalia	Euarchontoglires	Primates	1	ND	0	0	0
Leontopithecus rosalia	golden lion tamarin	Craniata	Gnathostomata	Mammalia	Euarchontoglires	Primates	1	ND	0	0	0
Callithrix jacchus	marmoset	Craniata	Gnathostomata	Mammalia	Euarchontoglires	Primates	9	9	1	1	1
Callimico goeldii	Goeldi's monkey	Craniata	Gnathostomata	Mammalia	Euarchontoglires	Primates	1	ND	0	0	0
Pithecia pithecia	guianan saki	Craniata	Gnathostomata	Mammalia	Euarchontoglires	Primates	1	ND	0	0	0
Callicebus moloch	dusky titi	Craniata	Gnathostomata	Mammalia	Euarchontoglires	Primates	1	ND	0	0	0
Tarsius syrichta	tarsier	Craniata	Gnathostomata	Mammalia	Euarchontoglires	Primates	1	8	1	1	1
Otolemur garnettii	bushbaby	Craniata	Gnathostomata	Mammalia	Euarchontoglires	Primates	9	9	1	1	1
Propithecus coquereli	coquerel's sifaka	Craniata	Gnathostomata	Mammalia	Euarchontoglires	Primates	1	ND	0	0	0
Microcebus murinus	mouse lemur	Craniata	Gnathostomata	Mammalia	Euarchontoglires	Primates	ND	9	1	1	1
Lepilemur edwardsi	sportive lemur	Craniata	Gnathostomata	Mammalia	Euarchontoglires	Primates	1	ND	0	0	0
Eulemur albifrons	White-fronted Brown Lemur	Craniata	Gnathostomata	Mammalia	Euarchontoglires	Primates	1	ND	0	0	0
Lemur catta	ring-tailed lemur	Craniata	Gnathostomata	Mammalia	Euarchontoglires	Primates	1	ND	0	0	0
Daubentonia madagascariensis	Aye-aye	Craniata	Gnathostomata	Mammalia	Euarchontoglires	Primates	1	ND	0	0	0
Perodicticus potto edwarsi	potto	Craniata	Gnathostomata	Mammalia	Euarchontoglires	Primates	1	ND	0	0	0
Tupaia belangeri	tree shrew	Craniata	Gnathostomata	Mammalia	Euarchontoglires	Scandentia	ND	9	1	1	1
Heterocephalus glaber	naked mole-rat	Craniata	Gnathostomata	Mammalia	Euarchontoglires	Rodentia	8	9	0	1	0
Cavia porcellus	guinea pig	Craniata	Gnathostomata	Mammalia	Euarchontoglires	Rodentia	9	9	1	1	1
Ictidomys tridecemlineatus	squirrel	Craniata	Gnathostomata	Mammalia	Euarchontoglires	Rodentia	9	9	1	1	1
Rattus norvegicus	rat	Craniata	Gnathostomata	Mammalia	Euarchontoglires	Rodentia	8	9	1	1	1
Mus musculus	mouse	Craniata	Gnathostomata	Mammalia	Euarchontoglires	Rodentia	9	9	1	1	1
Cricetulus griseus	chinese hamster	Craniata	Gnathostomata	Mammalia	Euarchontoglires	Rodentia	9	9	1	0	0
Dipodomys ordii	kangaroo rat	Craniata	Gnathostomata	Mammalia	Euarchontoglires	Rodentia	ND	7	1	1	1
Oryctolagus cuniculus	rabbit	Craniata	Gnathostomata	Mammalia	Euarchontoglires	Lagomorpha	9	9	1	1	1
Ochotona princeps	pika	Craniata	Gnathostomata	Mammalia	Euarchontoglires	Lagomorpha	ND	9	1	1	1
Ceratotherium simum	white rhinoceros	Craniata	Gnathostomata	Mammalia	Euarchontoglires	Perissodactyla	ND	9	0	1	0
Equus caballus	horse	Craniata	Gnathostomata	Mammalia	Laurasiatheria	Perissodactyla	9	9	1	1	0
Sorex araneus	shrew	Craniata	Gnathostomata	Mammalia	Laurasiatheria	Insectivora	ND	9	1	1	1
Suncus murinus	asian house shrew	Craniata	Gnathostomata	Mammalia	Laurasiatheria	Insectivora	1	ND	0	0	0
Erinaceus europaeus	hedgehog	Craniata	Gnathostomata	Mammalia	Laurasiatheria	Insectivora	ND	7	1	1	1
Pteropus vampyrus	Megabat	Craniata	Gnathostomata	Mammalia	Laurasiatheria	Chiroptera	ND	9	1	1	1
Myotis lucifugus	microbat	Craniata	Gnathostomata	Mammalia	Laurasiatheria	Chiroptera	8	9	1	1	1
Vicugna pacos	alpaca	Craniata	Gnathostomata	Mammalia	Laurasiatheria	Cetartiodactyla	ND	9	1	1	1
Tursiops truncatus	bottle-nosed dolphin	Craniata	Gnathostomata	Mammalia	Laurasiatheria	Cetartiodactyla	1	9	1	1	1
Sus scrofa	pig	Craniata	Gnathostomata	Mammalia	Laurasiatheria	Cetartiodactyla	9	9	1	1	1
Ovis aries	sheep	Craniata	Gnathostomata	Mammalia	Laurasiatheria	Cetartiodactyla	3	9	1	1	0
Capra hircus	goat	Craniata	Gnathostomata	Mammalia	Laurasiatheria	Cetartiodactyla	1	ND	0	0	0
Bos taurus	cow	Craniata	Gnathostomata	Mammalia	Laurasiatheria	Cetartiodactyla	9	9	1	1	1
Felis catus	cat	Craniata	Gnathostomata	Mammalia	Laurasiatheria	Carnivora	8	9	1	1	1
Mustela putorius furo	ferret	Craniata	Gnathostomata	Mammalia	Laurasiatheria	Carnivora	3	ND	1	0	1
Canis lupus familiaris	dog	Craniata	Gnathostomata	Mammalia	Laurasiatheria	Carnivora	9	9	1	1	1
Ailuropoda melanoleuca	panda	Craniata	Gnathostomata	Mammalia	Laurasiatheria	Carnivora	9	9	1	1	1
Dasypus novemcinctus	armadillo	Craniata	Gnathostomata	Mammalia	Xenarthra	Cingulata	9	9	1	1	1
Choloepus hoffmanni	sloth	Craniata	Gnathostomata	Mammalia	Xenarthra	Pilosa	5	9	1	1	1
Trichechus manatus	manatee	Craniata	Gnathostomata	Mammalia	Afrotheria	Sirenia	ND	9	0	1	0
Procavia capensis	rock hyrax	Craniata	Gnathostomata	Mammalia	Afrotheria	Hyracoidea	ND	9	1	1	1
Loxodonta africana	elephant	Craniata	Gnathostomata	Mammalia	Afrotheria	Proboscidea	9	9	1	1	1
Echinops telfairi	tenrec	Craniata	Gnathostomata	Mammalia	Afrotheria	Tenrecidae	ND	9	1	1	1
Sarcophilus harrisii	tasmanian devil	Craniata	Gnathostomata	Mammalia	Metatheria	Dasyuromorphia	9	9	1	1	1
Monodelphis domestica	opossum	Craniata	Gnathostomata	Mammalia	Metatheria	Didelphimorphia	9	8	1	1	1
Macropus eugenii	wallaby	Craniata	Gnathostomata	Mammalia	Metatheria	Diprotodontia	ND	9	1	1	1
Ornithorhynchus anatinus	platypus	Craniata	Gnathostomata	Mammalia	Monotremata	Ornithorhynchidae	9	9	1	1	1
Urocolius indicus	Red-faced mousebird	Craniata	Gnathostomata	Aves	Coliiformes	Coliidae	1	ND	0	0	0
Tyto alba	barn owl	Craniata	Gnathostomata	Aves	Neognathae	Strigiformes	1	ND	0	0	0
Tauraco erythrolophus	red-crested turaco	Craniata	Gnathostomata	Aves	Neognathae	Musophagidae	1	ND	0	0	0
Sphyrapicus varius	yellow-bellied sapsucker	Craniata	Gnathostomata	Aves	Neognathae	Piciformes	1	ND	0	0	0
Rhinopomastus cyanomelas	common scimitar-bill	Craniata	Gnathostomata	Aves	Neognathae	Upupiformes	1	ND	0	0	0
Psittacula alexandri	red-breasted parakeet	Craniata	Gnathostomata	Aves	Neognathae	Psittaciformes	1	ND	0	0	0
Melopsittacus undulatus	budgerigar	Craniata	Gnathostomata	Aves	Neognathae	Psittaciformes	1	8	1	1	0
Podiceps auritus	Horned Grebe	Craniata	Gnathostomata	Aves	Neognathae	Podicipediformes	1	ND	0	0	0
Phoenicopterus chilensis	Chilean flamingo	Craniata	Gnathostomata	Aves	Neognathae	Phoenicopteridae	1	ND	0	0	0
Phegornis mitchellii	diademed sandpiper-plover	Craniata	Gnathostomata	Aves	Neognathae	Charadriiformes	1	ND	0	0	0
Meleagris gallopavo	turkey	Craniata	Gnathostomata	Aves	Neognathae	Galliformes	3	7	1	1	1
Gallus gallus	chicken	Craniata	Gnathostomata	Aves	Neognathae	Galliformes	7	7	1	1	1
Coturnix coturnix	quail	Craniata	Gnathostomata	Aves	Neognathae	Galliformes	4	ND	0	0	0
Phaethon rubricauda	red-tailed tropicbird	Craniata	Gnathostomata	Aves	Neognathae	Pelecaniformes	1	ND	0	0	0
Phalacrocorax carbo	great cormorant	Craniata	Gnathostomata	Aves	Neognathae	Pelecaniformes	1	ND	0	0	0
Pitta guajana	bandedpitta	Craniata	Gnathostomata	Aves	Neognathae	Passeriformes	1	ND	0	0	0
Taeniopygia guttata	Zebra Finch	Craniata	Gnathostomata	Aves	Neognathae	Passeriformes	6	7	1	1	1
Geospiza fortis	medium ground finch	Craniata	Gnathostomata	Aves	Neognathae	Passeriformes	ND	7	0	1	0
Ficedula albicollis	collared flycatcher	Craniata	Gnathostomata	Aves	Neognathae	Passeriformes	ND	7	1	0	0
Opisthocomus hoazin	hoatzin	Craniata	Gnathostomata	Aves	Neognathae	Opisthocomiformes	1	ND	0	0	0
Oceanites oceanicus	Wilson's storm-petrel	Craniata	Gnathostomata	Aves	Neognathae	Procellariiformes	1	ND	0	0	0
Nyctibius grandis	greatpotoo	Craniata	Gnathostomata	Aves	Neognathae	Caprimulgiformes	1	ND	0	0	0
Momotus momota	blue-crowned motmot	Craniata	Gnathostomata	Aves	Neognathae	Coraciiformes	1	ND	0	0	0
Ardeotis kori	kori bustard	Craniata	Gnathostomata	Aves	Neognathae	Gruiformes	1	ND	0	0	0
Eurypyga helias	sunbittern	Craniata	Gnathostomata	Aves	Neognathae	Gruiformes	1	ND	0	0	0
Psophia crepitans	common trumpeter	Craniata	Gnathostomata	Aves	Neognathae	Gruiformes	1	ND	0	0	0
Gavia immer	common loon	Craniata	Gnathostomata	Aves	Neognathae	Gaviiformes	1	ND	0	0	0
Gampsonyx swainsonii	pearl kite	Craniata	Gnathostomata	Aves	Neognathae	Falconiformes	1	ND	0	0	0
Eudyptula minor	little blue penguin	Craniata	Gnathostomata	Aves	Neognathae	Sphenisciformes	1	ND	0	0	0
Columba livia	domestic pigeon	Craniata	Gnathostomata	Aves	Neognathae	Columbiformes	2	ND	0	0	0
Colibri coruscans	sparkling violet-ear	Craniata	Gnathostomata	Aves	Neognathae	Trochiliformes	1	ND	0	0	0
Scopus umbretta	hamerkop	Craniata	Gnathostomata	Aves	Neognathae	Ciconiiformes	1	ND	0	0	0
Pterocles exustus	chestnut-bellied sandgrouse	Craniata	Gnathostomata	Aves	Neognathae	Ciconiiformes	1	ND	0	0	0
Cathartes aura	turkey vulture	Craniata	Gnathostomata	Aves	Neognathae	Ciconiiformes	1	ND	0	0	0
Balaeniceps rex	shoebill	Craniata	Gnathostomata	Aves	Neognathae	Ciconiiformes	1	ND	0	0	0
Anser erythropus	lesser white-fronted goose	Craniata	Gnathostomata	Aves	Neognathae	Anseriformes	1	ND	0	0	0
Anas platyrhynchos	mallard duck	Craniata	Gnathostomata	Aves	Neognathae	Anseriformes	2	6	1	0	0
Struthio camelus	ostrich	Craniata	Gnathostomata	Aves	Palaeognathae	Struthioniformes	1	ND	0	0	0
Eudromia elegans	elegant crested-tinamou	Craniata	Gnathostomata	Aves	Palaeognathae	Tinamiformes	1	ND	0	0	0
Dromaius novaehollandiae	emu	Craniata	Gnathostomata	Aves	Palaeognathae	Casuariiformes	1	ND	0	0	0
Crocodylus porosus	estuarine crocodile	Craniata	Gnathostomata	Crocodylia	Longirostres	Crocodylidae	1	ND	0	0	0
Alligator mississippiensis	alligator	Craniata	Gnathostomata	Crocodylia		Alligatoridae	1	ND	0	0	0
Podarcis sicula	Italian wall lizard	Craniata	Gnathostomata	Lepidosauria	Squamata	Lacertidae	1	ND	0	0	0
Pantherophis guttatus	corn snake	Craniata	Gnathostomata	Lepidosauria	Squamata	Serpentes	1	ND	0	0	0
Python molurus	phython	Craniata	Gnathostomata	Lepidosauria	Squamata	Serpentes	9	ND	0	0	0
Ctenophorus ornatus	ornate dragon	Craniata	Gnathostomata	Lepidosauria	Squamata	Iguania	1	ND	0	0	0
Anolis carolinensis	lizard	Craniata	Gnathostomata	Lepidosauria	Squamata	Iguania	6	7	1	1	1
Pelodiscus sinensis	chinese softshell turtle	Craniata	Gnathostomata	Testudines	Cryptodira	Testudinoidea	3	9	1	0	1
Trachemys scripta	dime-store turtle	Craniata	Gnathostomata	Testudines	Cryptodira	Testudinoidea	4	ND	0	0	0
Chrysemys picta bellii	painted turtle	Craniata	Gnathostomata	Testudines	Cryptodira	Testudinoidea	1	9	1	1	0
Pseudepidalea raddei	mongolian toad	Craniata	Gnathostomata	Amphibia	Batrachia	Anura	1	ND	0	0	0
Xenopus tropicaliS	frog	Craniata	Gnathostomata	Amphibia	Batrachia	Anura	8	9	1	1	1
Xenopus laevis	clawed frog	Craniata	Gnathostomata	Amphibia	Batrachia	Anura	9	ND	0	0	0
Pleurodeles waltl	newt	Craniata	Gnathostomata	Amphibia	Batrachia	Caudata	1	ND	0	0	0
Notophthalmus viridescens	red-spotted newt	Craniata	Gnathostomata	Amphibia	Batrachia	Caudata	1	ND	0	0	0
Mesotriton alpestris	newt	Craniata	Gnathostomata	Amphibia	Batrachia	Caudata	1	ND	0	0	0
Cynops pyrrhogaster	japanese newt	Craniata	Gnathostomata	Amphibia	Batrachia	Caudata	1	ND	0	0	0
Ambystoma mexicanum	axolotl	Craniata	Gnathostomata	Amphibia	Batrachia	Caudata	2	ND	0	0	0
Latimeria chalumnae	coelacanth	Craniata	Gnathostomata	Sarcopterygii	Coelacanthimorpha	Coelacanthiformes	8	9	1	1	1
Tetraodon nigroviridis	tetraodon	Craniata	Gnathostomata	Actinopterygii	Acanthopterygii	Tetraodontiformes	14	13	1	1	1
Takifugu rubripes	fugu	Craniata	Gnathostomata	Actinopterygii	Acanthopterygii	Tetraodontiformes	14	12	1	1	1
Solea senegalensis	senegalese Sole	Craniata	Gnathostomata	Actinopterygii	Acanthopterygii	Pleuronectiformes	1	ND	0	0	0
Gasterosteus aculeatus	stickleback	Craniata	Gnathostomata	Actinopterygii	Acanthopterygii	Gasterosteiformes	12	12	1	1	1
Oryzias latipes	medaka	Craniata	Gnathostomata	Actinopterygii	Acanthopterygii	Beloniformes	12	8	1	1	1
Xiphophorus maculatus	Platyfish	Craniata	Gnathostomata	Actinopterygii	Acanthopterygii	Beloniformes	ND	13	1	0	1
Sebastiscus marmoratus	scorpionfish	Craniata	Gnathostomata	Actinopterygii	Acanthopterygii	Scorpaeniformes	1	ND	0	0	0
Dicentrarchus labrax	european sea bass	Craniata	Gnathostomata	Actinopterygii	Acanthopterygii	Perciformes	2	ND	0	0	0
Sparus aurata	silver seabream	Craniata	Gnathostomata	Actinopterygii	Acanthopterygii	Perciformes	1	ND	0	0	0
Bathybates graueri	keltapetoahven	Craniata	Gnathostomata	Actinopterygii	Acanthopterygii	Perciformes	1	ND	0	0	0
Cyphotilapia frontosa	humphead cichlid	Craniata	Gnathostomata	Actinopterygii	Acanthopterygii	Perciformes	1	ND	0	0	0
Eretmodus cyanostictus	tanganyika clown	Craniata	Gnathostomata	Actinopterygii	Acanthopterygii	Perciformes	1	ND	0	0	0
Pseudocrenilabrus philander	southern mouthbrooder	Craniata	Gnathostomata	Actinopterygii	Acanthopterygii	Perciformes	2	ND	0	0	0
Labidochromis caeruleus	yellow prince	Craniata	Gnathostomata	Actinopterygii	Acanthopterygii	Perciformes	1	ND	0	0	0
Haplochromis brownae	Cichlid Fish	Craniata	Gnathostomata	Actinopterygii	Acanthopterygii	Perciformes	1	ND	0	0	0
Haplochromis burtoni	Cichlid Fish	Craniata	Gnathostomata	Actinopterygii	Acanthopterygii	Perciformes	2	ND	0	0	0
Ctenochromis horei	mbaramatete	Craniata	Gnathostomata	Actinopterygii	Acanthopterygii	Perciformes	2	ND	0	0	0
Astatoreochromis alluaudi	alluaud's haplo	Craniata	Gnathostomata	Actinopterygii	Acanthopterygii	Perciformes	1	ND	0	0	0
Neolamprologus pulcher	prinsessen fra burundi	Craniata	Gnathostomata	Actinopterygii	Acanthopterygii	Perciformes	1	ND	0	0	0
Lamprologus callipterus	lamprologus tempo	Craniata	Gnathostomata	Actinopterygii	Acanthopterygii	Perciformes	2	ND	0	0	0
Limnochromis abeelei	isomutahautoja	Craniata	Gnathostomata	Actinopterygii	Acanthopterygii	Perciformes	1	ND	0	0	0
Oreochromis aureus	blue tilapia	Craniata	Gnathostomata	Actinopterygii	Acanthopterygii	Perciformes	1	ND	0	0	0
Oreochromis niloticus	nile tilapia	Craniata	Gnathostomata	Actinopterygii	Acanthopterygii	Perciformes	14	14	1	1	1
Perissodus microlepis	rusosuomunsyöjä	Craniata	Gnathostomata	Actinopterygii	Acanthopterygii	Perciformes	1	ND	0	0	0
Tropheus moorii	moorii	Craniata	Gnathostomata	Actinopterygii	Acanthopterygii	Perciformes	1	ND	0	0	0
Tropheus duboisi	dwarf tanganyikan cichlid	Craniata	Gnathostomata	Actinopterygii	Acanthopterygii	Perciformes	1	ND	0	0	0
Gadus morhua	atlantic cod	Craniata	Gnathostomata	Actinopterygii	Paracanthopterygii	Gadiformes	1	13	1	1	1
Salvelinus alpinus	arctic charr	Craniata	Gnathostomata	Actinopterygii	Protacanthopterygii	Salmoniformes	1	ND	0	0	0
Salmo salar	atlantic salmon	Craniata	Gnathostomata	Actinopterygii	Protacanthopterygii	Salmoniformes	1	ND	0	0	0
Oncorhynchus mykiss	rainbow trout	Craniata	Gnathostomata	Actinopterygii	Protacanthopterygii	Salmoniformes	2	ND	0	0	0
Sternopygus macrurus	Longtail Knifefish	Craniata	Gnathostomata	Actinopterygii	Otocephala	Gymnotiformes	1	ND	0	0	0
Anabarilius grahami	fish	Craniata	Gnathostomata	Actinopterygii		Cypriniformes	1	ND	0	0	0
Carassius auratus	gin-buna	Craniata	Gnathostomata	Actinopterygii	Cypriniformes	Cichlids	1	ND	0	0	0
Cyprinus carpio	mirror carp	Craniata	Gnathostomata	Actinopterygii	Cypriniformes	Cypriniformes	1	ND	0	0	0
Danio rerio	zebrafish	Craniata	Gnathostomata	Actinopterygii	Cypriniformes	Cyprinidae	15	15	1	1	1
Astyanax mexicanus	blind cave fish	Craniata	Gnathostomata	Actinopterygii	Characiformes	Characidae	3	ND	0	0	0
Polyodon spathula	paddlefish	Craniata	Gnathostomata	Actinopterygii	Actinopteri	Acipenseriformes	4	ND	0	0	0
Callorhinchus milii	elephant shark	Craniata	Gnathostomata	Chondrichthyes	Chimaeriformes	Callorhinchidae	2	5	0	0	0
Scyliorhinus torazame	Cloudy Catshark	Craniata	Gnathostomata	Chondrichthyes	Galeoidea	Carcharhiniformes	5	ND	0	0	0
Scyliorhinus canicula	spotted dogfish	Craniata	Gnathostomata	Chondrichthyes	Galeoidea	Carcharhiniformes	5	ND	0	0	0
Raja eglanteria	clear-nosed summer skate	Craniata	Gnathostomata	Chondrichthyes	Batoidea	Rajiformes	2	ND	0	0	0
Leucoraja erinacea	little summer skate	Craniata	Gnathostomata	Chondrichthyes	Batoidea	Rajiformes	1	ND	0	0	0
Petromyzon marinus	lamprey	Craniata	Hyperoartia			Petromyzontiformes	4	5	1	1	1
Lethenteron camtschaticum	arctic lamprey	Craniata	Hyperoartia			Petromyzontiformes	4	ND	0	0	0
Lampetra fluviatilis	lamprey	Craniata	Hyperoartia			Petromyzontiformes	4	ND	0	1	0
Eptatretus burgeri	hagfish	Craniata	Hyperotretia			Myxiniformes	3	ND	0	0	0
Oikopleura dioica	oikopleura	Tunicata	Appendicularia			Oikopleuridae	4	ND	0	0	0
Herdmania curvata	herdmania	Tunicata	Ascidiacea	Stolidobranchia		Pyuridae	1	ND	0	0	0
Halocynthia roretzi	tunicate	Tunicata	Ascidiacea	Stolidobranchia	Pyuridae	Halocynthia	3	ND	0	0	0
Phallusia mammillata	warty sea squirt	Tunicata	Ascidiacea	Enterogona	Phlebobranchia	Ascidiidae	3	ND	0	0	0
Ciona savignyi	pacific transparent sea squirt	Tunicata	Ascidiacea	Enterogona		Cionidae	5	4	1	0	1
Ciona intestinalis	yellow sea squirt	Tunicata	Ascidiacea	Enterogona		Cionidae	5	4	1	1	1
Branchiostoma belcheri	amphioxus japonicus	Cephalochordata				Branchiostomidae	4	ND	0	0	0
Branchiostoma floridae	florida Lancelet	Cephalochordata				Branchiostomidae	4	ND	0	0	0
Branchiostoma lanceolatum	common lancelet	Cephalochordata				Branchiostomidae	4	1	0	1	0
HMMER: number of sequence hits found in a HMMER search; GEN: number of sequence hits found in the Ensembl and UCSC browsers; Ensembl, UCSC and SYN (species with synteny/ neighborhood checks): 0=No and 1=Yes.
